# Supplementary material
Source: publisher figshare collection journal article supplement (https://brill.figshare.com/ndownloader/files/38086917)
Supplement: Supplementary file 1 [file 38086917]

# Figshare Figures

These images have been made available online and can be accessed at [10.6084/m9.figshare.21456738](https://doi.org/10.6084/m9.figshare.21456738)

- 4.6 Front of coffin of Nedjes, Copenhagen 5131. Courtesy of the National Museum of Copenhagen.
- 4.7 Lid of coffin of Nedjes, Copenhagen 5131. Courtesy of the National Museum of Copenhagen.
- 4.8 Head end of coffin of Nedjes, Copenhagen 5131. Courtesy of the National Museum of Copenhagen.
- 4.9 Food end of coffin of Nedjes, Copenhagen 5131. Courtesy of the National Museum of Copenhagen.
- 5.4 Portrait Statue of Pharaoh Amenhotep II, c. 1400 B.C., recarved for Ramesses II (the Great) c. 1250 B.C., rose granite, 40 ½ × 18 × 15 in, AP 1982.04; Kimbell Art Museum, Fort Worth, Texas.
- 5.5 Overseer of Weavers, Min, ca. 1479–1425 B.C.E. Green siltstone or greywacke, 9 1/4 × 4 1/2 × 6 in., 14 lb. (23.5 × 11.4 × 15.2 cm, 6.35 kg). Brooklyn Museum, Charles Edwin Wilbour Fund, 37.249E.
- 5.6 Head of a queen, from a sphinx (MFA SC39147), 1897–1878 BCE. Quartzite. \* Partial gift of Magda Saleh and Jack A. Josephson in honor of Dr. Rita E. Freed, Norma Jean Calderwood Curator of Ancient Egyptian, Nubian, and Near Eastern Art and museum purchase with funds from the Florence E. and Horace L. Mayer Funds, Egyptian Curator's Fund, Marilyn M. Simpson Fund, Norma Jean and Stanford Calderwood Discretionary Fund, Mr. and Mrs. James M. Vaughn, Jr., The Vaughn Foundation Fund, Egyptian Deaccession Fund, Mr. and Mrs. John H. Valentine, Jane Marsland and Judith A. Marsland Fund, Ernest Kahn Fund, Susan Cornelia Warren Fund, Samuel Putnam Avery Fund, Mary L. Smith Fund, John Wheelock Elliot and John Morse Elliot Fund, Mary E. Moore Gift, Mrs. James Evans Ladd, Frank Jackson and Nancy McMahon, Alice M. Bartlett Fund, Benjamin Pierce Cheney Donation, Frank M. and Mary T.B. Ferrin Fund, Meg Holmes Robbins, Mr. and Mrs. Mark R. Goldweitz, Allen and Elizabeth R. Mottur, Barbara and Joanne Herman, Clark and Jane Hinkley, Walter and Celia Gilbert, Mr. and Mrs. Gorham L. Cross, Mr. and Mrs. Miguel de Bragança, Honey Scheidt, Mr. and Mrs. G. Arnold Haynes and Margaret J. Faulkner. \* Photograph © Museum of Fine Arts, Boston
- 5.7 Dice figure of Harwa, 26th Dynasty 664–525 BCE. Diorite. 48 × 23.5 × 27.5 cm. ÄM 8163. Photo: Jürgen Liepe. Ägyptisches Museum und Papyrussammlung, Staatliche Museum, Berlin, Germany.

- 5.8 Block statue of Iti. © The Trustees of the British Museum. Shared under a Creative Commons Attribution-NonCommercial-ShareAlike 4.0 International (CC BY-NC-SA 4.0) licence.
- 5.9 Head of Shabatako. Light brown quartzite. Said to come from Memphis; Dynasty 25. 716–700 BCE. Height 18 1/8 inches (46 cm). From the Ägyptische Sammlung, Munich, ÄS 4859.
- 5.10 Unknown artist (Egyptian, Late Period, 8th century B.C.), Amenirdis I, the Divine Consort, c. 700 B.C., XXV Dynasty, granite, 26 × 15 × 12 in (sculpture only), Joslyn Art Museum, Omaha, Nebraska, Museum Purchase, 1953.80.
- 5.11 Sphinx of Shepenupet, “divine spouse of Amun”. Egypt, 25th Dynasty (Kushite, 746–655 BCE). From the temple of Amun at Karnak. Black granite, 46,5 × 82 cm. Inv. ÄM 7972. Photo: Jürgen Liepe. Ägyptisches Museum und Papyrussammlung, Staatliche Museum, Berlin, Germany.
- 6.1 MFA 11.1738, Menkaure dyad, from Menkaure’s valley temple (MVT): (a) frontal view, (b) three-quarter rear view from proper left. Photography by Michael Fredericks. (Courtesy of the Museum of Fine Arts in Boston).
- 6.2 MFA 11.1738, Menkaure dyad, details: (a) no pleating on lappets of king’s nemes headdress, (b) no striations on queen’s Hathoric wig, (c) no pleating on king’s kilt, (d) no inscription on base; queen’s feet and legs without final modeling or polish. Photography by Michael Fredericks. (Courtesy of the Museum of Fine Arts in Boston).
- 6.3 MFA 11.1738, Menkaure dyad, details of base: (a) proper left front corner, (b) hammered, pitted and unpolished surfaces retain burial soil, (c) surface “crust” with soil accretions, (d) underside of broken head with a similar crust from burial. Photography by author. (Courtesy of the Museum of Fine Arts in Boston).
- 6.4 Dyad found in southwest corridor of Menkaure valley temple: (a) valley temple plan, Reisner 1931, Plan IX, with additions of findspots by author, (b) Daniel Jones, AERA’s Senior Archaeologist, points up (north) to where four triads were found and down (south) to where dyad was found. Photography by author.
- 6.5 Harvard University—Museum of Fine Arts Egyptian Expedition, Photo Registers, New Series. (Courtesy of the Museum of Fine Arts in Boston).
- 6.6 (a) MFA 11.1738, Menkaure dyad, in situ, from Reisner 1931, pl. 54b; dated according to Reisner’s diary, Wednesday, January 19, 1910, (b) detail of the king’s beard showing five rows, including chin strap, followed by a break at the 6th row. (Courtesy of the Museum of Fine Arts in Boston).
- 6.7 Excerpt from Reisner’s diary, Vol.01.p.010–p.012, dated January 20, 1910, detailing how stones were shoved under standing dyad to create a flooring; a platform was then slipped behind the dyad on which it was raised out of the hole. (Courtesy of the Harvard Museum of the Ancient Near East.)

- 6.8 Dyad hole with water rushing in, March 2020. Photography by Mark Lehner. (Courtesy of Mark Lehner, Director and President, Ancient Egypt Research Associates (AERA)).
- 6.9 Interpretation by Jean-Louis Lachevre of Reisner's diary description of moving the dyad: (a) tilting dyad right and shoving stones under left side; Lachevre suggests they used non-abrasive wooden timbers as a brace, shown here with a question mark, (b) tilting dyad left and shoving stones under right side; Lachevre suggests they used a flat wooden brace on left side onto which the dyad was tilted, (c) tilting and stone placement were repeated several times to raise statue onto a stable flooring of multiple layers of stone, so it could be lifted and moved out of the hole. Drawing by Michelle Pisa, based on concept and drawings by Jean-Louis Lachevre.
- 6.10 (a) Heads of king and queen from MFA 11.1738 at Harvard Camp on January 20, 1910, (b) detail of the king's beard. (Courtesy of the Museum of Fine Arts in Boston).
- 6.11 (a) Detail of king's beard from dyad, MFA 11.1738, showing nine rows in total, (b) first five rows are original, while bottom four rows are repair and restoration. Photography by Michael Fredericks. (Courtesy of the Museum of Fine Arts in Boston).
- 6.12 (a) Photo of heads of king and queen from dyad, MFA 11.1738, showing white fills on beard before tinting, (b) back of photograph. (Courtesy of the Museum of Fine Arts in Boston).
- 6.13 A 5' 5" man standing beside MFA 11.1738. Drawing by Michelle Pisa. (Courtesy of the Museum of Fine Arts in Boston).
- 6.14 (a) Detail of map by Rebekah Miracle, AERA GIS. AERAGram, vol. 20, no. 1, Spring 2019, 7, (b) photo by Sayed Salah, AERAGram, vol. 20, no. 1, Spring 2019, 8. East is to the right in (a) and at top in (b). (Courtesy of Mark Lehner, Director and President, Ancient Egypt Research Associates (AERA)).
- 6.15 (a) Detail of excavation photo of MFA 11.1738, in valley temple, Reisner 1931, pl. 54c, (b) proper left front corner of base. Photography of (b) by author. (Courtesy of the Museum of Fine Arts in Boston).
- 6.16 Two views of proper left side of dyad base, MFA 11.1738. Photography by author. (Courtesy of the Museum of Fine Arts in Boston).
- 6.17 Proper right side of dyad base, MFA 11.1738. Photography by author. (Courtesy of the Museum of Fine Arts in Boston).
- 6.18 (a) Proper left rear corner of dyad base, MFA 11.1738; shiny wear from handling appears on top of, and thus later than, the breaks, (b) proper right rear corner of dyad, (c) proper right front corner of dyad, (d) lower rear of dyad. Photography of base by author. Photography of dyad by Michael Fredericks. (Courtesy of the Museum of Fine Arts in Boston).

- 6.19 Type 1 Menkaure triads: (a) JE 40678,\*\* (b) JE 46499,\*\* (c) JE 40679,\*\* (d) MFA 11.3147,\* with king in center. Type 2 triads: (e) MFA 09.200,\* (f) MFA 12.1514,\* with Hathor in center. Menkaure dyad: (g) MFA 11.1738,\* with Queen assimilated to Hathor. Photography by Michael Fredericks. (\*Courtesy of the Museum of Fine Arts in Boston and \*\*Courtesy of the Egyptian Museum in Cairo).
- 6.20 Menkaure triads: (a) MFA 09.200,\* (b) JE 40679,\*\* (c) JE 46499,\*\* (d) JE 40678,\*\* proper left rear corner; on left, with modern damage or possibly from pivoting in antiquity. Photography of (a) by Michael Fredericks. Photography of (b-d) by author. (\*Courtesy of the Museum of Fine Arts in Boston and \*\*Courtesy of the Egyptian Museum in Cairo).
- 7.4 The corridor and antechamber. (Photography by the author.)
- 7.5 The decorated ceiling. (Photography by the author.)
- 7.6 The eastern wall of the antechamber. (Photography by the author.)
- 7.7 23 columns on the eastern wall. (Photography by the author.)
- 7.8 Thoth on the eastern wall. (Photography by the author.)
- 7.9 The guarding goddess the mummy. (Photography by the author.)
- 7.10 24 columns of inscription on the eastern wall. (Photography by the author.)
- 7.11 Shaved heads and short kilts on the eastern wall. (Photography by the author.)
- 7.12 Three registers on the southern wall. (Photography by the author.)
- 7.13 The sarcophagus of the diseased. (Photography by the author.)
- 7.14 The complete sarcophagus. (Photography by the author.)
- 7.15 Small amulets of faience bearing the names of Osiris and Isis. (Photography by the author.)
- 7.16 Shawabti made of blue faience. (Photography by the author.)
- 7.17 Gold amulets. (Photography by the author.)
- 9.4 Surface of the cleared strip (a) compared to the surface of the desert (b). Photography by author.
- 9.5 Looking east-northeast from the center of the cleared strip. The line of rocks in the middle distance marks the northeast edge of the strip. Photography by author.
- 9.6 Standing on a rock, looking northwest along the northeast edge of the cleared strip. Photography by author.
- 11.2 Saw marks on the left side and center of the lintel indicate that it was cut from a larger block, and the central portion removed, in modern times. Photography by author.
- 11.3 A patch of ancient plaster on the right fragment of the lintel. Photography by author.
- 11.4 The lintel of Ptahshepses Impy in the gallery. Photography by author.
- 21.2 TA 04 (Meryra), royal visit to the temple from Davies, *Amarna* 1, pl. x-xa. (Courtesy of the Egypt Exploration Society, amendments from the author.)

- 21.3 TA 04 (Meryra), Meryra receiving promotion from the King from Davies, *Amarna* I, pl. VI. (Courtesy of the Egypt Exploration Society, amendments from the author.)
- 21.4 TA 04 (Meryra), reward of the King from Davies, *Amarna* I, pl. XXV. (Courtesy of the Egypt Exploration Society, amendments from the author.)
- 21.5 TA 08 (Tutu), Tutu receiving promotion from the king from Davies, *Amarna* VI, pl. XVII–XX. (Courtesy of the Egypt Exploration Society, amendments from the author.)
- 21.6 TA 09 (Mahu), reward of the king (scene damaged) from Davies, *Amarna* IV, pl. XVII. (Courtesy of the Egypt Exploration Society, amendments from the author.)
- 21.7 TA 09 (Mahu), visit to the temple from Davies, *Amarna* IV, pl. XVIII–XIX. (Courtesy of the Egypt Exploration Society, amendments from the author.)
- 21.8 TA 09 (Mahu), Duties of Mahu as a policeman from Davies, *Amarna* IV, pl. XXVI. (Courtesy of the Egypt Exploration Society, amendments from the author.)
- 21.9 TA 25 (Ay), reward of the king, guards hearing the news from Davies, *Amarna* VI, pl. XXX. (Courtesy of the Egypt Exploration Society, amendments from the author.)
- 29.4 Chapel of Ptahwer with two unfinished false doors. (Photography by the author.)
- 29.5 Detail of the graffito. (Photography by the author.)
- 29.6 Burial chamber of Ptahwer, looking west. (Photography by the author.)
